# Supplementary material
Source: MDPI journal article supplement (https://www.mdpi.com/2304-6740/11/9/356)
Supplement: s1 [file s1]

## Supplementary Materials :

### The “Periodic Table” of 1-methylbenzotriazole: Zinc(II) Complexes

Christina Stamou, Eleftheria Barouni, John C. Plakatouras, Michael M. Sigalas,  
Catherine P. Raptopoulou, Vassilis Psycharis, Evangelos G. Bakalbassis and  
Spyros P. Perlepes

**Table S1.** Selected bond lengths (Å) and angles (°) for complex **5**, obtained experimentally (X-Ray) and computationally (BSI and BSII).

|                  | Distances (Å) |       |       |
|------------------|---------------|-------|-------|
|                  | X-Ray         | BSI   | BSII  |
| Zn-O(4)          | 1.992(2)      | 2.00  | 2.00  |
| Zn-N(13)         | 1.995(2)      | 2.05  | 2.06  |
| Zn-N(3)          | 1.996(2)      | 2.03  | 2.04  |
| Zn-O(1)          | 2.016(2)      | 1.98  | 1.99  |
| Zn···O(2)        | 2.588(5)      | 2.60  | 2.51  |
| Zn···O(6)        | 2.722(6)      | 2.66  | 2.66  |
| Angles (°)       |               |       |       |
| O(4)-Zn-N(13)    | 105.0(1)      | 100.3 | 100.8 |
| O(4)-Zn-N(3)     | 117.4(1)      | 118.2 | 114.0 |
| N(13)-Zn-N(3)    | 118.2(1)      | 114.8 | 118.1 |
| O(4)-Zn-O(1)     | 87.9(1)       | 100.6 | 98.8  |
| N(13)-Zn-O(1)    | 108.2(1)      | 110.7 | 111.2 |
| N(3)-Zn-O(1)     | 115.7(1)      | 111.0 | 111.8 |
| O(2)···Zn···O(6) | 164.3(1)      | 152.0 | 152.2 |

**Table S2.** Selected bond lengths (Å) and angles (°) for complex **6**, obtained experimentally (X-Ray) and computationally (BSI and BSII).

| <b>Distances (Å)</b> |          |       |       |
|----------------------|----------|-------|-------|
|                      | X-Ray    | BSI   | BSII  |
| Zn-N(3)              | 2.040(2) | 2.14  | 2.15  |
| Zn-N(3')             | 2.040(2) | 2.14  | 2.15  |
| Zn-O(1)              | 2.061(2) | 2.10  | 2.08  |
| Zn-O(1')             | 2.061(2) | 2.10  | 2.08  |
| Zn-O(2)              | 2.388(2) | 2.20  | 2.19  |
| Zn-O(2')             | 2.388(2) | 2.20  | 2.19  |
| <b>Angles (°)</b>    |          |       |       |
| N(3)-Zn-N(3')        | 101.7(1) | 87.5  | 90.0  |
| N(3')-Zn-O(1')       | 105.9(1) | 95.3  | 95.3  |
| N(3)-Zn-O(1')        | 97.6(1)  | 97.9  | 98.7  |
| N(3')-Zn-O(1)        | 97.6(1)  | 97.9  | 98.7  |
| N(3)-Zn-O(1)         | 105.9(1) | 95.1  | 95.3  |
| O(1)-Zn-O(1')        | 142.5(1) | 161.9 | 160.1 |
| N(3')-Zn-O(2)        | 153.7(1) | 154.8 | 155.5 |
| N(3)-Zn-O(2')        | 153.7(1) | 155.0 | 155.5 |

**Table S3.** Liquid-phase Cartesian coordinates of Mebta, calculated by the MP2/6-31+G(d) computational protocol, in ethanol with the PCM model.

|   |             |             |             |
|---|-------------|-------------|-------------|
| C | -2.56372900 | -0.02864900 | 0.00083600  |
| C | -2.01502000 | 1.28482300  | 0.00203900  |
| C | -0.64526800 | 1.50988200  | -0.01721700 |
| C | 0.16529600  | 0.35966400  | 0.01116400  |
| C | -0.36546400 | -0.95088100 | -0.01095400 |
| C | -1.76051900 | -1.15929200 | 0.01637000  |
| N | 0.67140400  | -1.84957200 | -0.00662300 |
| N | 1.81177400  | -1.15324400 | -0.00525800 |
| N | 1.51402000  | 0.17002800  | -0.00433700 |
| C | 2.57466500  | 1.16859800  | 0.01265600  |
| H | -3.64541100 | -0.14149500 | 0.01485300  |
| H | -2.69174600 | 2.13633400  | -0.01101500 |
| H | -0.23023200 | 2.51488100  | -0.01637200 |
| H | -2.18026100 | -2.16270600 | 0.01316600  |
| H | 2.51140100  | 1.75597300  | 0.93076500  |
| H | 2.47543500  | 1.82029300  | -0.85747700 |
| H | 3.52275400  | 0.63282500  | -0.02618500 |

**Table S4.** Gas-phase Cartesian coordinates of **5** and **6**, calculated by the wB97XD/6-311+G\*\* computational protocol (BSI).

| <b>5</b> |             |             |             |
|----------|-------------|-------------|-------------|
| Zn       | 0.01348900  | -1.00486700 | 0.42845400  |
| N        | 3.97659600  | -0.57032300 | -0.25627200 |
| N        | 2.84897300  | -1.21795700 | -0.02008400 |
| N        | 1.93014400  | -0.35545500 | 0.26363100  |
| C        | 1.88068100  | 2.17116200  | 0.43330200  |
| C        | 2.71451300  | 3.25537900  | 0.28876300  |
| C        | 4.07876500  | 3.11134000  | -0.05921300 |
| C        | 4.65119100  | 1.87753200  | -0.27264100 |
| C        | 2.45372700  | 0.91191000  | 0.21493200  |
| C        | 3.79882100  | 0.77694200  | -0.12751900 |
| C        | 5.18086500  | -1.29680600 | -0.60264600 |
| N        | -2.24381800 | 1.74645700  | -1.62391900 |
| N        | -1.11321300 | 1.16035300  | -1.25469000 |
| N        | -1.39086600 | 0.24297600  | -0.39252200 |
| C        | -3.52843200 | -0.59346200 | 0.67057500  |
| C        | -4.88325000 | -0.35791600 | 0.64446700  |
| C        | -5.45412300 | 0.63761900  | -0.18398900 |
| C        | -4.68917100 | 1.43155600  | -1.00926200 |
| C        | -2.74374700 | 0.20767900  | -0.17001000 |
| C        | -3.31093400 | 1.19072500  | -0.97988700 |
| C        | -2.23257400 | 2.81177800  | -2.60382900 |
| N        | 0.11478300  | -2.82084900 | -1.55642200 |
| O        | -0.16799200 | -2.84716700 | -0.28677900 |
| O        | 0.38561300  | -1.71423800 | -2.04716200 |
| O        | 0.09778800  | -3.85476200 | -2.18121600 |
| N        | -0.72411100 | -0.11336000 | 2.90127600  |
| O        | -0.74786500 | -1.24462500 | 2.26399300  |
| O        | -1.26587700 | -0.03615200 | 3.97833500  |
| O        | -0.14274100 | 0.83325400  | 2.34744800  |
| H        | 0.84303500  | 2.26502300  | 0.72155100  |
| H        | 2.32258200  | 4.25173600  | 0.45458400  |
| H        | 4.68965500  | 4.00142100  | -0.15470200 |
| H        | 5.69619300  | 1.76662100  | -0.53342500 |
| H        | 4.91739600  | -2.34882300 | -0.68676000 |
| H        | 5.56300200  | -0.93629700 | -1.55865300 |
| H        | 5.93448400  | -1.16340100 | 0.17507700  |
| H        | -3.07632600 | -1.34233700 | 1.30987500  |
| H        | -5.53586500 | -0.94700800 | 1.27707400  |
| H        | -6.52831800 | 0.77954200  | -0.16280300 |
| H        | -5.12903200 | 2.19348000  | -1.64045800 |
| H        | -1.19477500 | 3.00129100  | -2.86927200 |
| H        | -2.67655600 | 3.71216700  | -2.17647300 |
| H        | -2.78899500 | 2.50659200  | -3.49141900 |

---

|    |             |             |             |
|----|-------------|-------------|-------------|
| Zn | -1.14325000 | 2.60393900  | 3.74622700  |
| N  | 0.11880400  | -0.31423300 | 6.48840700  |
| N  | 0.26280800  | 0.76158200  | 5.72206500  |
| N  | -0.87631300 | 1.04886400  | 5.19294000  |
| C  | -3.18408800 | 0.01650400  | 5.32034900  |
| C  | -3.84173100 | -1.03488200 | 5.91737700  |
| C  | -3.17915000 | -1.94131100 | 6.77869800  |
| C  | -1.83826000 | -1.82441200 | 7.07148900  |
| C  | -1.81767600 | 0.13972800  | 5.60926500  |
| C  | -1.17109600 | -0.75675000 | 6.46026500  |
| C  | 1.24313400  | -0.84097500 | 7.23221300  |
| N  | -3.02575600 | 3.77410800  | 4.99836500  |
| O  | -3.19670200 | 2.92806600  | 4.04620400  |
| O  | -1.82126400 | 4.04035600  | 5.26361300  |
| O  | -3.95672300 | 4.25635400  | 5.58768700  |
| H  | -3.68114200 | 0.73349400  | 4.67750100  |
| H  | -4.90101900 | -1.17114300 | 5.73527700  |
| H  | -3.74841100 | -2.74796500 | 7.22581000  |
| H  | -1.33473000 | -2.51460800 | 7.73684800  |
| H  | 1.06335700  | -0.73888400 | 8.30371500  |
| H  | 2.12123100  | -0.26285300 | 6.95203600  |
| H  | 1.39585600  | -1.89131700 | 6.97942900  |
| N  | -2.37671300 | -0.26985600 | 0.94241800  |
| N  | -2.53060700 | 0.79276100  | 1.72516500  |
| N  | -1.39962900 | 1.06740200  | 2.27774300  |
| C  | 0.90762800  | 0.03219600  | 2.16906200  |
| C  | 1.57266000  | -1.00995400 | 1.56410900  |
| C  | 0.92206000  | -1.89966300 | 0.67660000  |
| C  | -0.41378200 | -1.77472600 | 0.36462200  |
| C  | -0.45376600 | 0.16333200  | 1.86068300  |
| C  | -1.08850200 | -0.71636500 | 0.98371300  |
| C  | -3.49021900 | -0.78040000 | 0.17150400  |
| N  | 0.73564400  | 3.79757000  | 2.51111800  |
| O  | 0.90982900  | 2.94149200  | 3.45338200  |
| O  | -0.47007000 | 4.06083000  | 2.24761700  |
| O  | 1.66457700  | 4.29173900  | 1.92850200  |
| H  | 1.39567200  | 0.73711500  | 2.83180400  |
| H  | 2.62885200  | -1.15140000 | 1.75983500  |
| H  | 1.49691300  | -2.69949100 | 0.22437800  |
| H  | -0.90775300 | -2.45212700 | -0.32074900 |
| H  | -3.29383200 | -0.65907000 | -0.89507700 |
| H  | -4.37152000 | -0.20573500 | 0.44869600  |
| H  | -3.64877900 | -1.83486000 | 0.40262700  |

---

**Table S5.** Gas-phase Cartesian coordinates of **5** and **6**, calculated by the wB97XD/Def2tzvp computational protocol (BSII).

| <b>5</b> |             |             |             |
|----------|-------------|-------------|-------------|
| Zn       | 0.01769300  | -0.96553100 | 0.33758100  |
| N        | 4.01377100  | -0.60978400 | -0.20447800 |
| N        | 2.86038200  | -1.21985400 | -0.01571400 |
| N        | 1.94714200  | -0.33038800 | 0.17053500  |
| C        | 1.95122600  | 2.19640800  | 0.23927900  |
| C        | 2.81781500  | 3.25237600  | 0.10914400  |
| C        | 4.19364700  | 3.06397600  | -0.14526600 |
| C        | 4.74524700  | 1.81322000  | -0.27654000 |
| C        | 2.50247900  | 0.91924200  | 0.10468900  |
| C        | 3.85989200  | 0.74144700  | -0.14454200 |
| C        | 5.21554700  | -1.37299700 | -0.44558300 |
| N        | -2.41596300 | 1.71554700  | -1.61171600 |
| N        | -1.25974300 | 1.14065100  | -1.32520600 |
| N        | -1.46422300 | 0.22208200  | -0.44877800 |
| C        | -3.51016800 | -0.63251100 | 0.75833000  |
| C        | -4.86158000 | -0.40775100 | 0.83156100  |
| C        | -5.49660500 | 0.58517800  | 0.05368100  |
| C        | -4.80065700 | 1.38365800  | -0.82097300 |
| C        | -2.79433500 | 0.17528300  | -0.13056800 |
| C        | -3.42548600 | 1.15271600  | -0.89314200 |
| C        | -2.48594500 | 2.78132900  | -2.58202400 |
| N        | 0.06457900  | -2.85517600 | -1.51419200 |
| O        | -0.19067400 | -2.85917600 | -0.24437200 |
| O        | 0.32912100  | -1.75387600 | -2.02253700 |
| O        | 0.03275200  | -3.89071000 | -2.12810000 |
| N        | -0.58800600 | -0.00288300 | 2.82007200  |
| O        | -0.61702000 | -1.15474700 | 2.22971100  |
| O        | -1.02586000 | 0.09221900  | 3.93930400  |
| O        | -0.10906500 | 0.94631100  | 2.18379500  |
| H        | 0.90173900  | 2.32694500  | 0.45654900  |
| H        | 2.44250400  | 4.26172100  | 0.21399400  |
| H        | 4.83108600  | 3.93411400  | -0.23398900 |
| H        | 5.79971000  | 1.66887600  | -0.46743200 |
| H        | 4.95226700  | -2.42584800 | -0.39989600 |
| H        | 5.61486800  | -1.13653400 | -1.43146000 |
| H        | 5.95884100  | -1.14459200 | 0.31766300  |
| H        | -3.00976500 | -1.37983900 | 1.35981600  |
| H        | -5.46255700 | -1.00341800 | 1.50530900  |
| H        | -6.56538000 | 0.72068900  | 0.15553600  |
| H        | -5.28994200 | 2.14475200  | -1.41321100 |
| H        | -1.48623700 | 2.93357900  | -2.97871500 |
| H        | -2.84031000 | 3.69642600  | -2.10788900 |
| H        | -3.16128900 | 2.50156000  | -3.39015000 |

---

|    |             |             |             |
|----|-------------|-------------|-------------|
| Zn | -1.12613100 | 2.46461400  | 3.74170900  |
| N  | 0.10635800  | -0.28632700 | 6.66605900  |
| N  | 0.26050300  | 0.69643100  | 5.79108900  |
| N  | -0.87403000 | 0.94482700  | 5.24023400  |
| C  | -3.19250500 | -0.02734400 | 5.49400400  |
| C  | -3.86057300 | -0.99560600 | 6.20215200  |
| C  | -3.20616900 | -1.81463900 | 7.14767600  |
| C  | -1.86428100 | -1.69029000 | 7.41495600  |
| C  | -1.82481900 | 0.10334200  | 5.75597500  |
| C  | -1.18710200 | -0.70678800 | 6.69133800  |
| C  | 1.22645500  | -0.75507400 | 7.44578000  |
| N  | -2.99448500 | 3.68138800  | 4.93728400  |
| O  | -3.16057400 | 2.82363300  | 3.99815500  |
| O  | -1.79534500 | 3.92350500  | 5.23236200  |
| O  | -3.92785400 | 4.19667800  | 5.48805700  |
| H  | -3.68575700 | 0.62351600  | 4.78386400  |
| H  | -4.92165800 | -1.13311200 | 6.04220000  |
| H  | -3.78382400 | -2.55821900 | 7.68136400  |
| H  | -1.36648000 | -2.31475300 | 8.14425200  |
| H  | 1.03893200  | -0.58938400 | 8.50647700  |
| H  | 2.10134200  | -0.18979200 | 7.13698200  |
| H  | 1.39009200  | -1.81706400 | 7.26371400  |
| N  | -2.35860800 | -0.28632500 | 0.81735300  |
| N  | -2.51275900 | 0.69642100  | 1.69233600  |
| N  | -1.37822700 | 0.94482300  | 2.24318800  |
| C  | 0.94024800  | -0.02735200 | 1.98943000  |
| C  | 1.60831700  | -0.99561500 | 1.28128600  |
| C  | 0.95391800  | -1.81464700 | 0.33575800  |
| C  | -0.38796900 | -1.69029500 | 0.06847000  |
| C  | -0.42743700 | 0.10333600  | 1.72745200  |
| C  | -1.06515000 | -0.70679200 | 0.79208500  |
| C  | -3.47869900 | -0.75506100 | 0.03761800  |
| N  | 0.74222100  | 3.68139100  | 2.54613300  |
| O  | 0.90831200  | 2.82363900  | 3.48526400  |
| O  | -0.45692100 | 3.92350500  | 2.25105400  |
| O  | 1.67558900  | 4.19668200  | 1.99535900  |
| H  | 1.43349700  | 0.62350600  | 2.69957300  |
| H  | 2.66940200  | -1.13312300 | 1.44124200  |
| H  | 1.53157500  | -2.55822600 | -0.19792900 |
| H  | -0.88576700 | -2.31475500 | -0.66083100 |
| H  | -3.29116800 | -0.58936300 | -1.02307600 |
| H  | -4.35358800 | -0.18978100 | 0.34641300  |
| H  | -3.64233900 | -1.81705300 | 0.21967300  |

---

**Table S6.** Sum of electronic and thermal free energies (a.u.) of complexes **5** and **6** (BSI and BSII).

| Complex  | BSI          | BSII         |
|----------|--------------|--------------|
| <b>5</b> | -3210.109391 | -3210.378632 |
| <b>6</b> | -3210.110223 | -3210.379412 |

**Table S7.** Crystallographic data and structural refinement parameters for complexes **3** and **4**.

| Parameter                                                                                   | [ZnBr <sub>2</sub> (Mebta) <sub>2</sub> ] ( <b>3</b> )           | [ZnI <sub>2</sub> (Mebta) <sub>2</sub> ] ( <b>4</b> )           |
|---------------------------------------------------------------------------------------------|------------------------------------------------------------------|-----------------------------------------------------------------|
| Empirical formula                                                                           | C <sub>14</sub> H <sub>14</sub> ZnBr <sub>2</sub> N <sub>6</sub> | C <sub>14</sub> H <sub>14</sub> ZnI <sub>2</sub> N <sub>6</sub> |
| Formula weight                                                                              | 491.50                                                           | 585.48                                                          |
| Crystal system                                                                              | triclinic                                                        | monoclinic                                                      |
| Space group                                                                                 | <i>P</i> $\bar{1}$                                               | <i>P</i> 2 <sub>1</sub> / <i>c</i>                              |
| Color, habit                                                                                | colorless, parallelepiped                                        | colorless, parallelepiped                                       |
| Crystal size, mm                                                                            | 0.32x0.42x0.52                                                   | 0.17x0.24x0.75                                                  |
| <i>a</i> , Å                                                                                | 7.6642(1)                                                        | 15.9969(2)                                                      |
| <i>b</i> , Å                                                                                | 8.1402(1)                                                        | 8.4320(1)                                                       |
| <i>c</i> , Å                                                                                | 14.2671(2)                                                       | 13.6229(2)                                                      |
| $\alpha$ , °                                                                                | 78.230(1)                                                        | 90.00(1)                                                        |
| $\beta$ , °                                                                                 | 83.206(1)                                                        | 95.904(1)                                                       |
| $\gamma$ , °                                                                                | 71.356(1)                                                        | 90.00(1)                                                        |
| Volume, Å <sup>3</sup>                                                                      | 824.30(2)                                                        | 1827.79(4)                                                      |
| <i>Z</i>                                                                                    | 2                                                                | 4                                                               |
| Temperature, K                                                                              | 160(2)                                                           | 160(2)                                                          |
| Radiation, Å                                                                                | Cu K $\alpha$ , 1.54178                                          | Cu K $\alpha$ , 1.54178                                         |
| Calculated density, g cm <sup>-3</sup>                                                      | 1.980                                                            | 2.128                                                           |
| Absorption coefficient, mm <sup>-1</sup>                                                    | 7.812                                                            | 28.449                                                          |
| No. of measured, independent and observed [ <i>I</i> > 2 $\sigma$ ( <i>I</i> )] reflections | 9958, 2582, 2453                                                 | 26131, 3203, 3129                                               |
| <i>R</i> <sub>int</sub>                                                                     | 0.0432                                                           | 0.1378                                                          |
| Number of parameters                                                                        | 264                                                              | 210                                                             |
| Final <i>R</i> indices [ <i>I</i> > 2 $\sigma$ ( <i>I</i> )] <sup>a,b</sup>                 | <i>R</i> <sub>1</sub> = 0.0347, <i>wR</i> <sub>2</sub> = 0.0880  | <i>R</i> <sub>1</sub> = 0.0443, <i>wR</i> <sub>2</sub> = 0.1190 |
| Goodness-of-fit on <i>F</i> <sup>2</sup>                                                    | 1.10                                                             | 1.07                                                            |
| Largest differences peak and hole (e Å <sup>-3</sup> )                                      | 0.66/-0.91                                                       | 1.42/-1.58                                                      |

<sup>a</sup>  $R_1 = (\Sigma(|F_o| - |F_c|)/\Sigma(|F_o|))$ ,  $wR_2 = \{\Sigma[w(F_o^2 - F_c^2)^2]/\Sigma[w(F_o^2)^2]\}^{1/2}$ ,  $w = 1/\sigma^2(F_o^2) + (aP)^2 + bP$ , where  $P = [\max(F_o^2, 0) + 2F_c^2]/3$ .

<sup>b</sup> For **3**, *a* = 0.0431, *b* = 1.7397; for **4**, *a* = 0.0730, *b* = 2.4599.



**Table S8.** Crystallographic data and structural refinement parameters for complexes 5-7.

| Parameter                                                                                  | tet-[Zn(NO <sub>3</sub> ) <sub>2</sub> (Mebta) <sub>2</sub> ]<br>(5) | oct-[Zn(NO <sub>3</sub> ) <sub>2</sub> (Mebta) <sub>2</sub> ]<br>(6) | [Zn(Mebta) <sub>4</sub> ] (ClO <sub>4</sub> ) <sub>2</sub><br>(7)                |
|--------------------------------------------------------------------------------------------|----------------------------------------------------------------------|----------------------------------------------------------------------|----------------------------------------------------------------------------------|
| Empirical formula                                                                          | C <sub>14</sub> H <sub>14</sub> ZnN <sub>8</sub> O <sub>6</sub>      | C <sub>14</sub> H <sub>14</sub> ZnN <sub>8</sub> O <sub>6</sub>      | C <sub>28</sub> H <sub>28</sub> ZnCl <sub>2</sub> N <sub>12</sub> O <sub>8</sub> |
| Formula weight                                                                             | 455.70                                                               | 455.70                                                               | 796.89                                                                           |
| Crystal system                                                                             | triclinic                                                            | monoclinic                                                           | monoclinic                                                                       |
| Space group                                                                                | <i>P</i> $\bar{1}$                                                   | <i>C</i> 2/ <i>c</i>                                                 | <i>I</i> 2/ <i>a</i>                                                             |
| Color, habit                                                                               | colorless, parallelepiped                                            | colorless, parallelepiped                                            | colorless, parallelepiped                                                        |
| Crystal size, mm                                                                           | 0.20x0.25x0.30                                                       | 0.20x0.20x0.50                                                       | 0.64x0.68x0.70                                                                   |
| <i>a</i> , Å                                                                               | 8.4531(12)                                                           | 12.726(7)                                                            | 18.5986(3)                                                                       |
| <i>b</i> , Å                                                                               | 15.844(2)                                                            | 10.067(5)                                                            | 15.4065(2)                                                                       |
| <i>c</i> , Å                                                                               | 7.2484(11)                                                           | 15.630(9)                                                            | 23.2569(5)                                                                       |
| $\alpha$ , °                                                                               | 82.018(6)                                                            | 90.00(1)                                                             | 90.00(1)                                                                         |
| $\beta$ , °                                                                                | 70.404(5)                                                            | 106.75(2)                                                            | 92.193(1)                                                                        |
| $\gamma$ , °                                                                               | 83.908(5)                                                            | 90.00(1)                                                             | 90.00(1)                                                                         |
| Volume, Å <sup>3</sup>                                                                     | 903.9(2)                                                             | 1917.4(18)                                                           | 6659.1(2)                                                                        |
| <i>Z</i>                                                                                   | 2                                                                    | 4                                                                    | 8                                                                                |
| Temperature, K                                                                             | 293(2)                                                               | 293(2)                                                               | 160(2)                                                                           |
| Radiation, Å                                                                               | Cu K $\alpha$ , 1.54178                                              | Mo K $\alpha$ , 0.71078                                              | Cu K $\alpha$ , 1.54178                                                          |
| Calculated density, g cm <sup>-3</sup>                                                     | 1.674                                                                | 1.579                                                                | 1.590                                                                            |
| Absorption coefficient, mm <sup>-1</sup>                                                   | 2.382                                                                | 1.331                                                                | 3.101                                                                            |
| No. of measured, independent and observed [ <i>I</i> >2 $\sigma$ ( <i>I</i> )] reflections | 3259, 3000, 2870                                                     | 1950, 1878, 1703                                                     | 40357, 5643, 5394                                                                |
| <i>R</i> <sub>int</sub>                                                                    | 0.076                                                                | 0.0238                                                               | 0.0338                                                                           |
| Number of parameters                                                                       | 318                                                                  | 160                                                                  | 578                                                                              |
| Final <i>R</i> indices [ <i>I</i> >2 $\sigma$ ( <i>I</i> )] <sup>a,b</sup>                 | <i>R</i> <sub>1</sub> = 0.0326, <i>wR</i> <sub>2</sub> = 0.0900      | <i>R</i> <sub>1</sub> = 0.0311, <i>wR</i> <sub>2</sub> = 0.0819      | <i>R</i> <sub>1</sub> = 0.0400, <i>wR</i> <sub>2</sub> = 0.0937                  |
| Goodness-of-fit on <i>F</i> <sup>2</sup>                                                   | 1.12                                                                 | 1.08                                                                 | 1.06                                                                             |
| Largest differences peak and hole (e Å <sup>-3</sup> )                                     | 0.51/-0.40                                                           | 0.27/-0.29                                                           | 0.58/-0.72                                                                       |

<sup>a</sup>  $R_1 = (\sum(|F_o| - |F_c|) / \sum(|F_o|))$ ,  $wR_2 = \{\sum[w(F_o^2 - F_c^2)^2] / \sum[w(F_o^2)^2]\}^{1/2}$ ,  $w = 1/\sigma^2(F_o^2) + (aP)^2 + bP$ , where  $P = [\max(F_o^2, 0) + 2F_c^2]/3$ .

<sup>b</sup> For **5**, *a* = 0.0320, *b* = 0.5254; for **6**, *a* = 0.0266, *b* = 1.9740; for **7**, *a* = 0.0361, *b* = 20.5559.

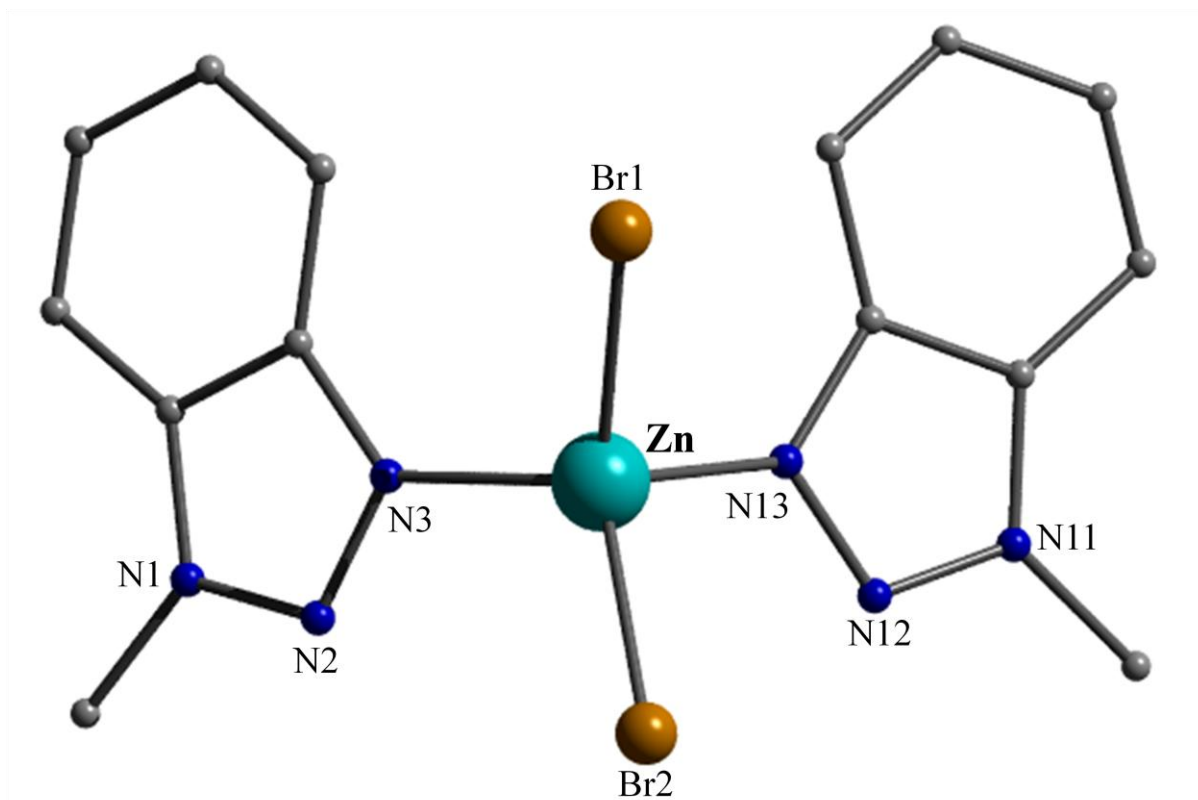

**Figure S1.** Partially labelled ball and stick representation of the structure of the molecule  $[\text{ZnBr}_2(\text{Mebta})_2]$  that is present in **3**. The H atoms have not been drawn.

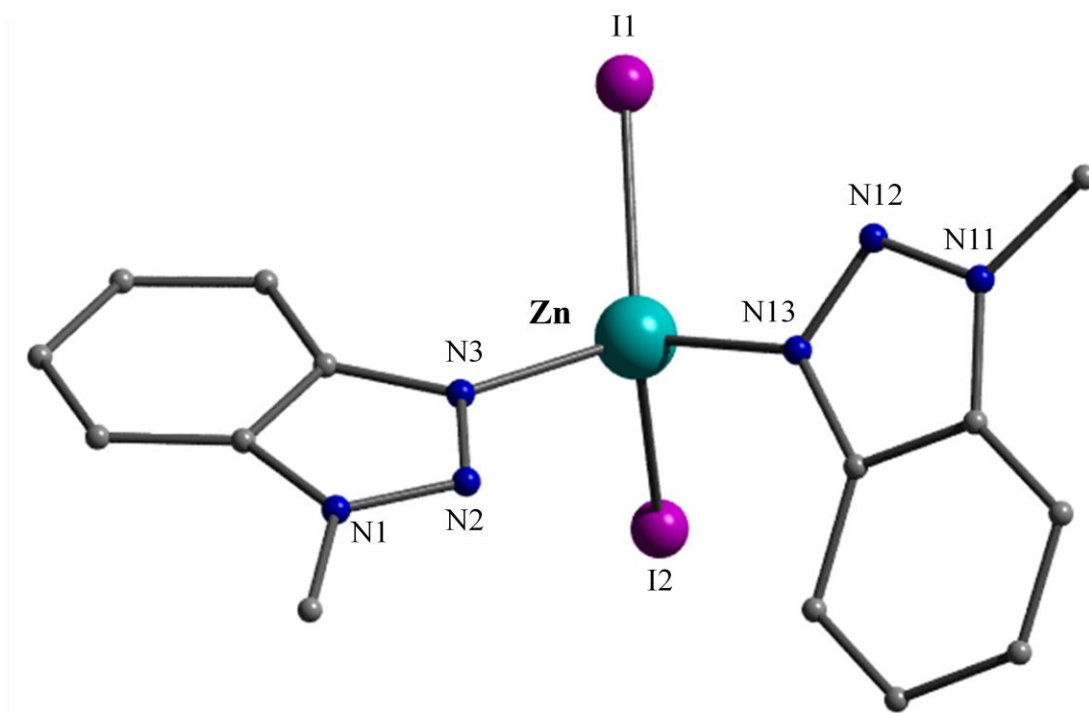

**Figure S2.** Partially labelled ball and stick representation of the structure of the molecule  $[\text{ZnI}_2(\text{Mebta})_2]$  that is present in **4**. The H atoms have not been drawn.

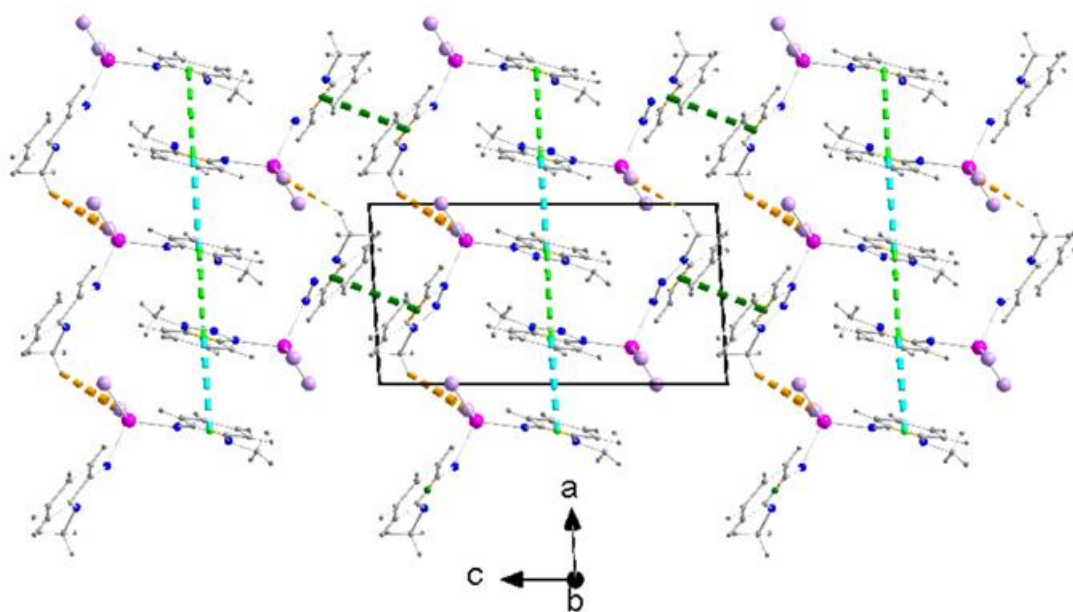

a)

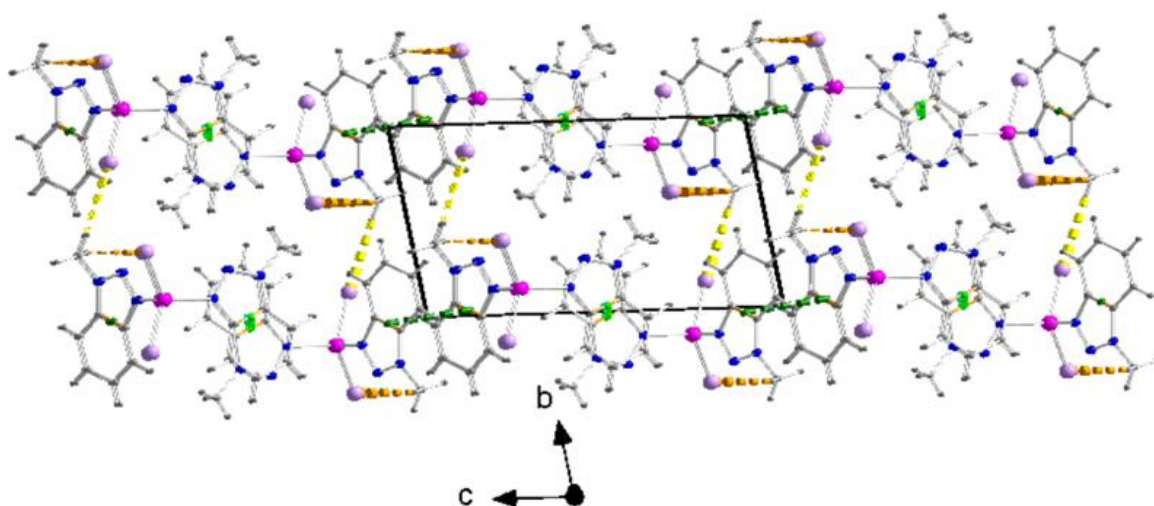

b)

**Figure S3.** (a) Layers of  $[\text{ZnBr}_2(\text{Mebta})_2]$  molecules parallel to the (010) plane in **3**. (b) Side view parallel to the  $a$  axis of the stacks of layers developed along the  $b$  axis in the structure of **3**. Light green, cyan and dark green dashed lines indicate  $\pi$ - $\pi$  stacking interactions. Orange and yellow dashed lines denote the  $\text{C20-H}_\text{B}(\text{C20})\cdots\text{Br2}$  and  $\text{C20-H}_\text{c}(\text{C20})\cdots\text{Br1}$  H bonds, respectively. For more details, see the text of the paper.

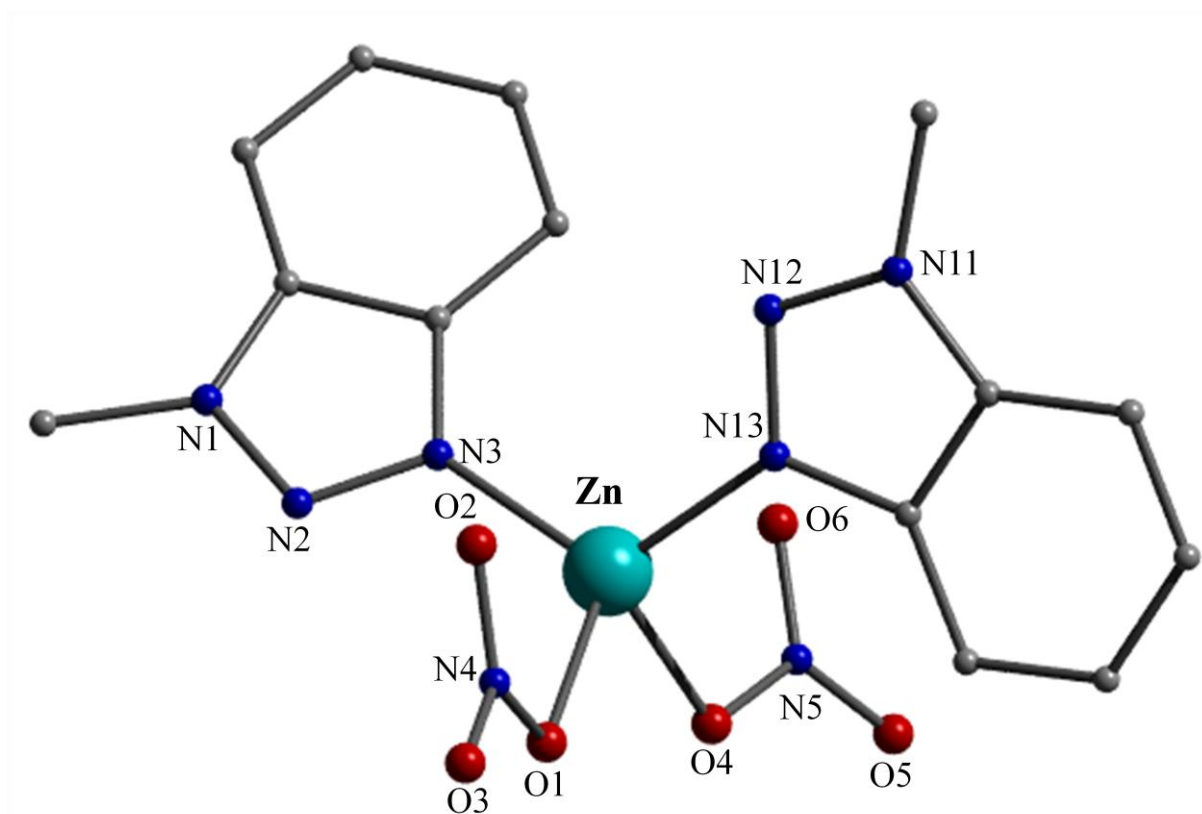

**Figure S4.** Partially labelled ball and stick representation of the structure of the molecule tet-[Zn(NO<sub>3</sub>)<sub>2</sub>(Mebta)<sub>2</sub>] that is present in 5. The long Zn···O2 and Zn···O6, weakly bonding interactions are not shown. The H atoms have not been drawn.

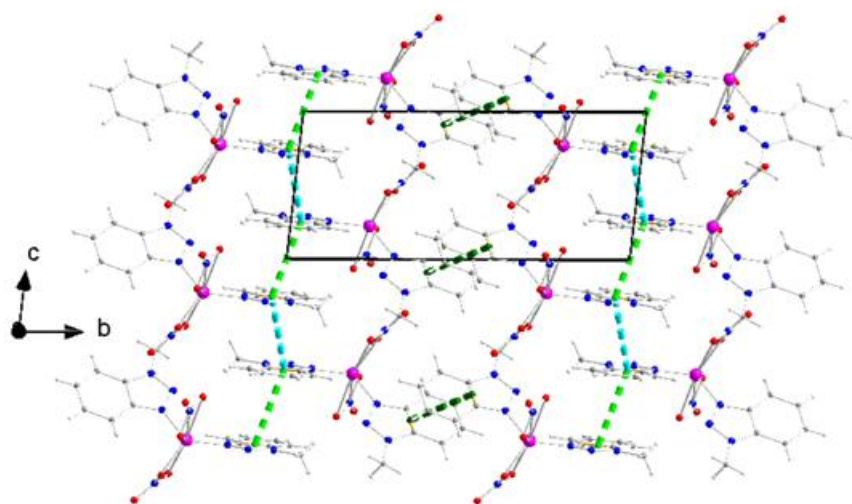

a)

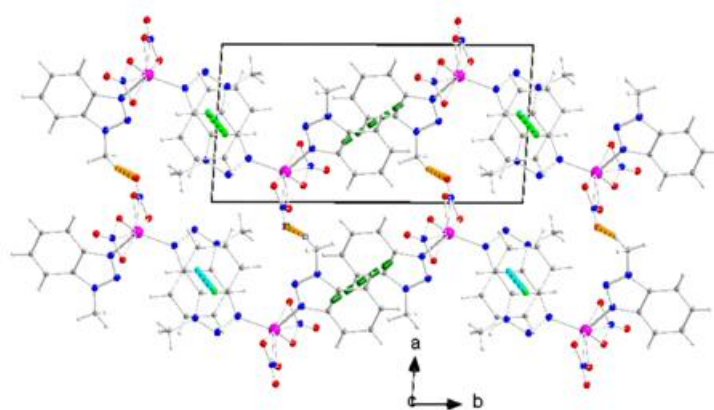

b)

**Figure S5.** (a) Layers of tet-[Zn(NO<sub>3</sub>)<sub>2</sub>(Mebta)<sub>2</sub>] molecules parallel to the (100) plane in **5**. (b) Side view parallel to the *c* axis of the stacks of layers developed along the *a* axis in the crystal structure of **5**. Light green, cyan and dark green dashed lines indicate  $\pi$ - $\pi$  stacking interactions. Orange dashed lines denote the C20-H<sub>A</sub>(C20)···O3 H bonds.

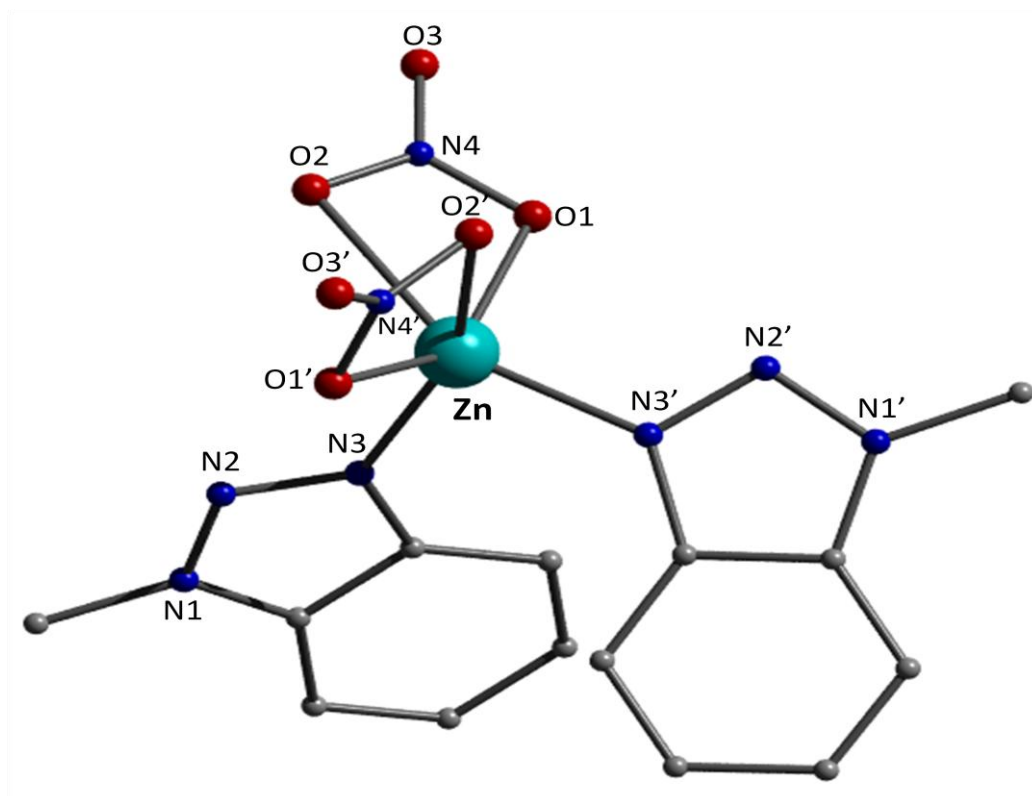

**Figure S6.** Partially labelled ball and stick representation of the structure of the molecule oct-[Zn(NO<sub>3</sub>)<sub>2</sub>(Mebta)<sub>2</sub>] that is present in **6**. The H atoms have not been drawn. Primed atoms are generated by the symmetry operation  $-x, y, -z+1/2$ .

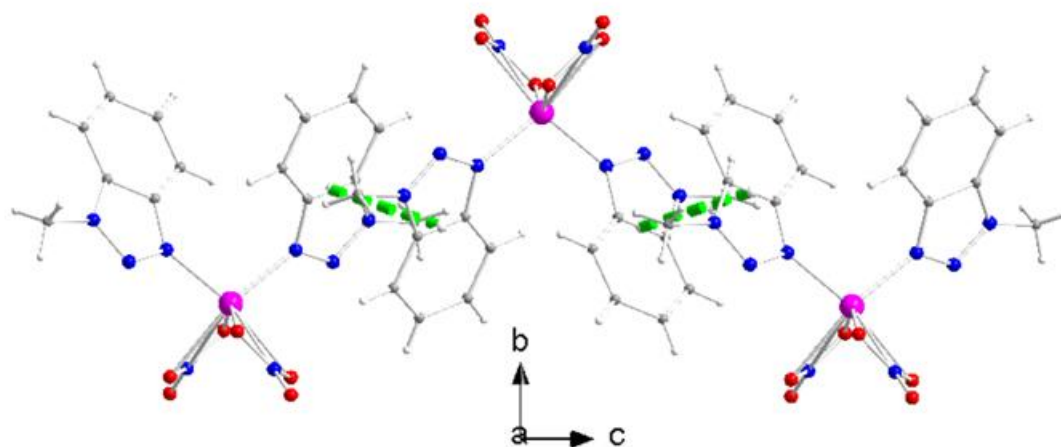

a)

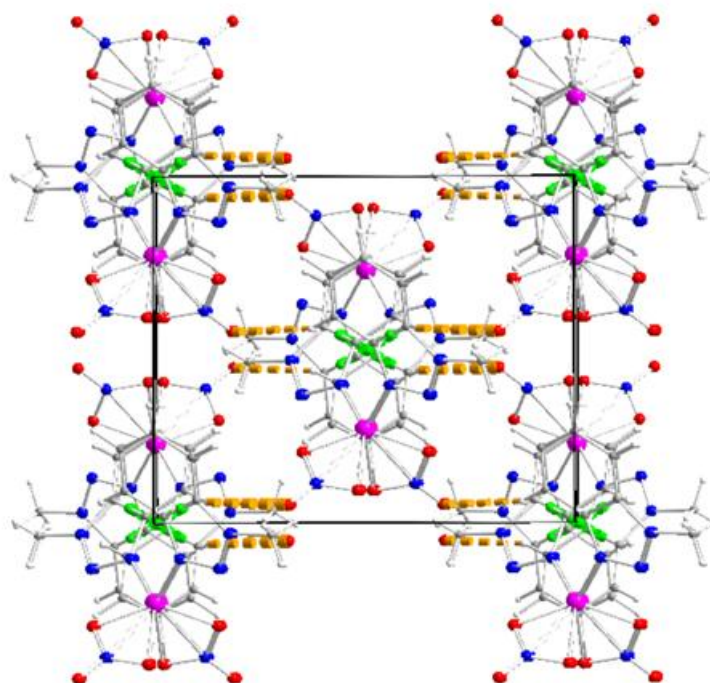

b)

**Figure S7.** (a) A small portion of the zig-zag chains along the  $c$  axis due to  $\pi$ - $\pi$  stacking interactions in **6**. (b) A small part of the 3D framework due to C4-H(C4)...O3 H-bonding interactions. Light green and orange dashed lines indicate  $\pi$ - $\pi$  and H-bonding interactions, respectively.



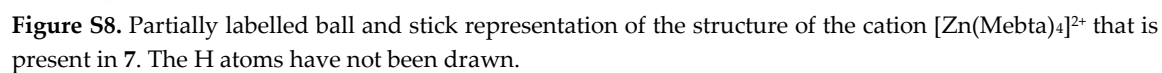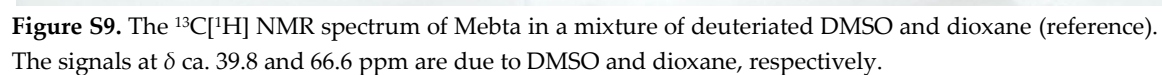



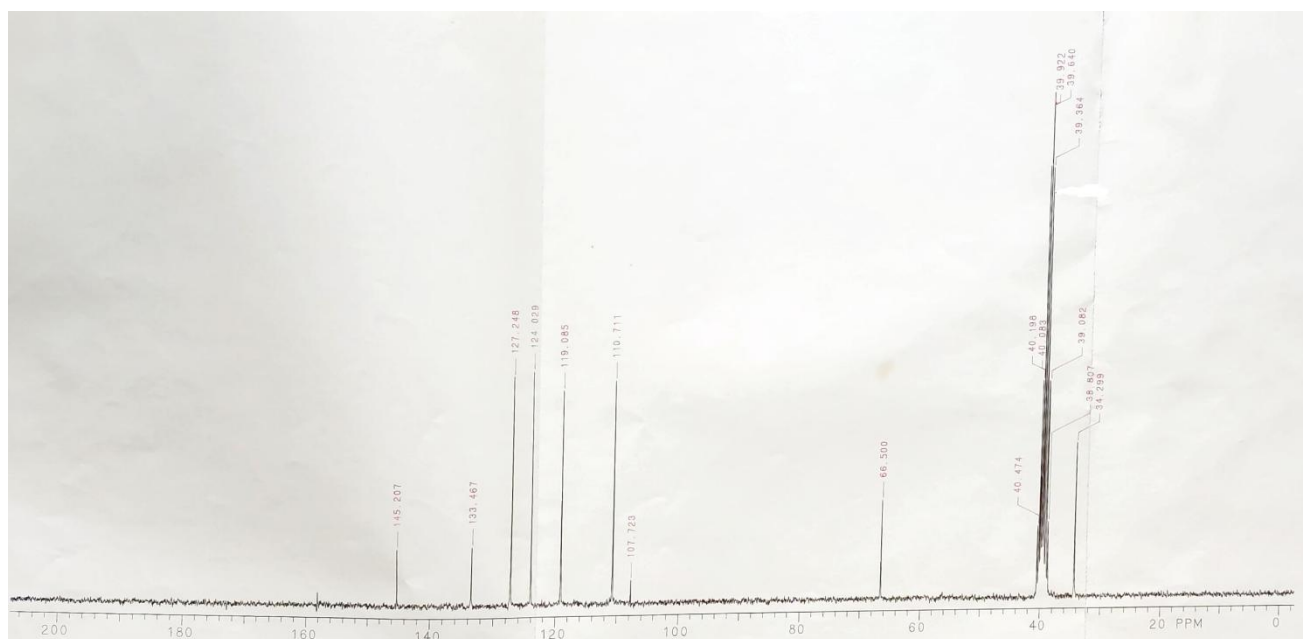

**Figure S10.** The  $^{13}\text{C}[^1\text{H}]$  NMR spectrum of  $[\text{ZnCl}_2(\text{Mebta})_2]$  (**1**) in a mixture of deuterated DMSO and dioxane (reference). The signals at  $\delta$  ca. 39.8 and 66.6 ppm are due to DMSO and dioxane, respectively.

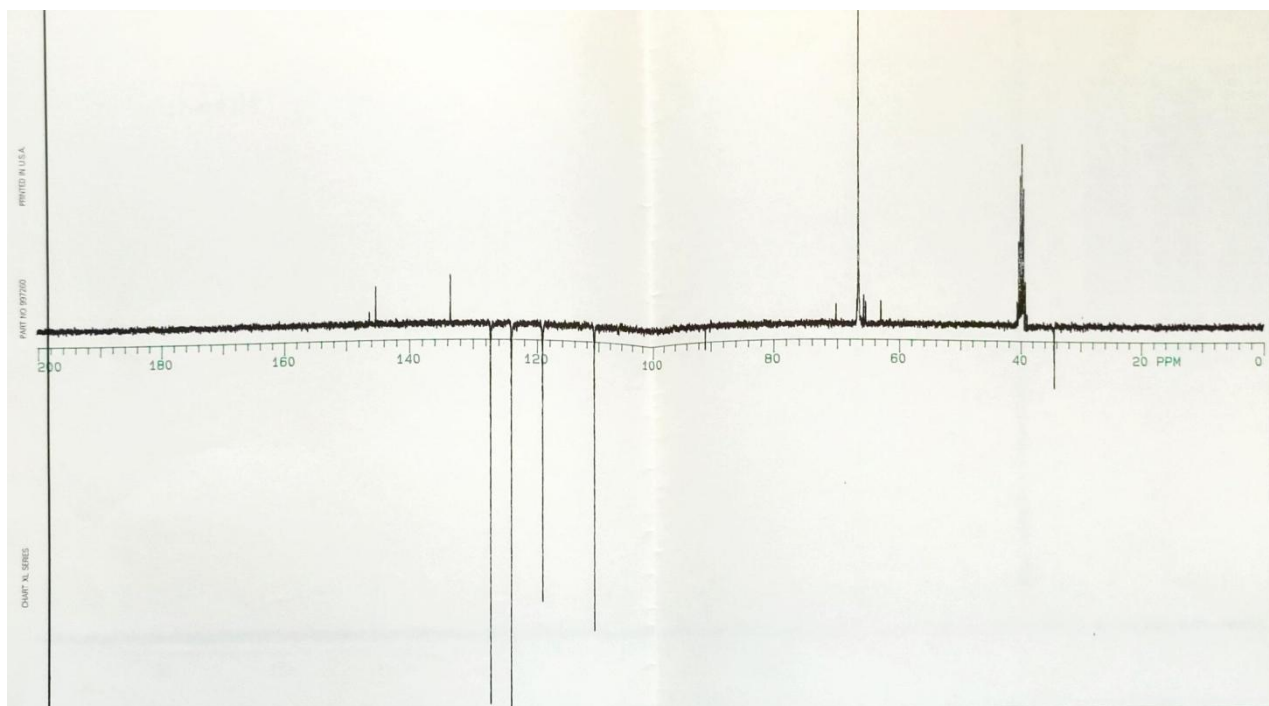

**Figure S11.** The APT  $^{13}\text{C}$  NMR spectrum of  $[\text{ZnI}_2(\text{Mebta})_2]$  (**4**) in a mixture of deuterated DMSO and dioxane (reference). The signals at  $\delta$  ca. 39.8 and 66.6 ppm are due to DMSO and dioxane, respectively.

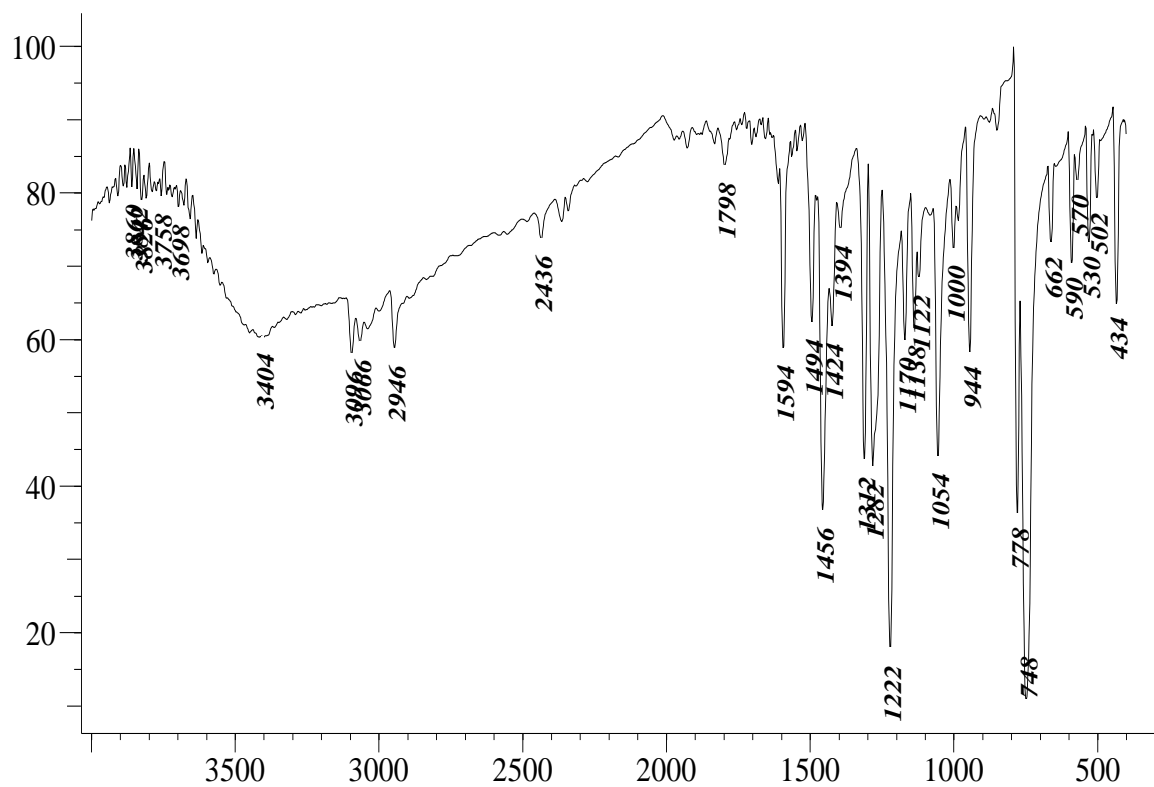

Figure S12. The IR spectrum (KBr, cm<sup>-1</sup>) of [ZnCl<sub>2</sub>(Mebta)<sub>2</sub>] (1).

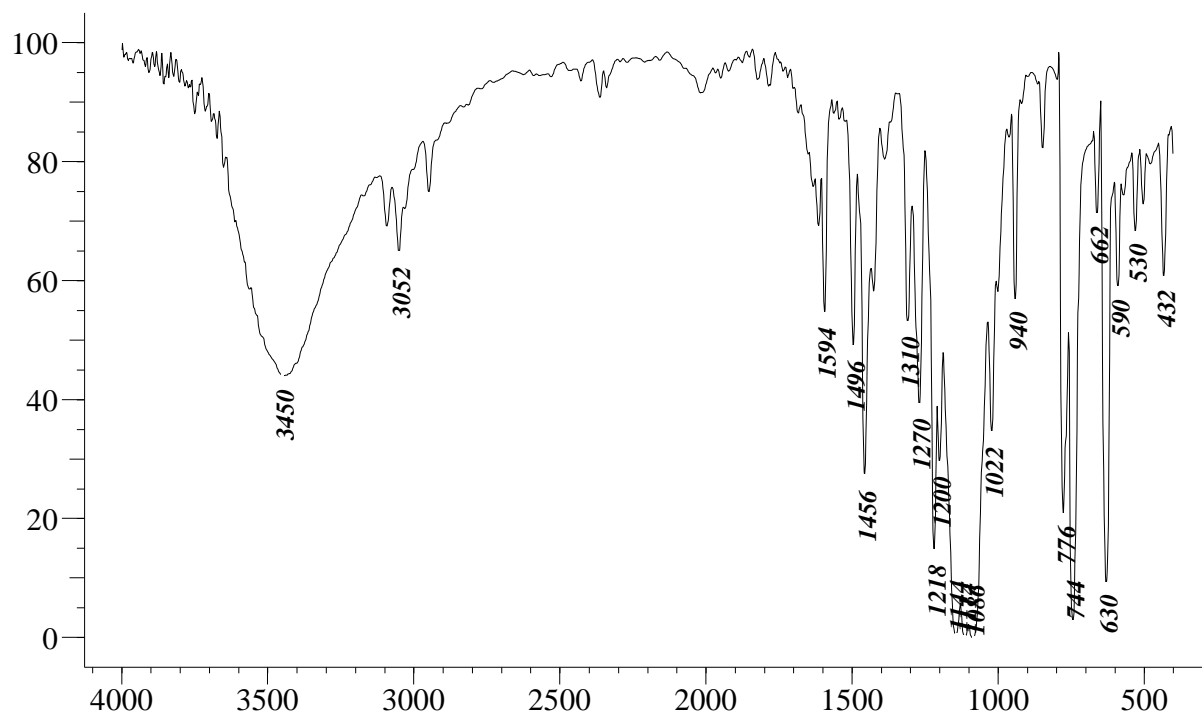

Figure S13. The IR spectrum (KBr, cm<sup>-1</sup>) of [Zn(Mebta)<sub>4</sub>](ClO<sub>4</sub>)<sub>2</sub> (7).

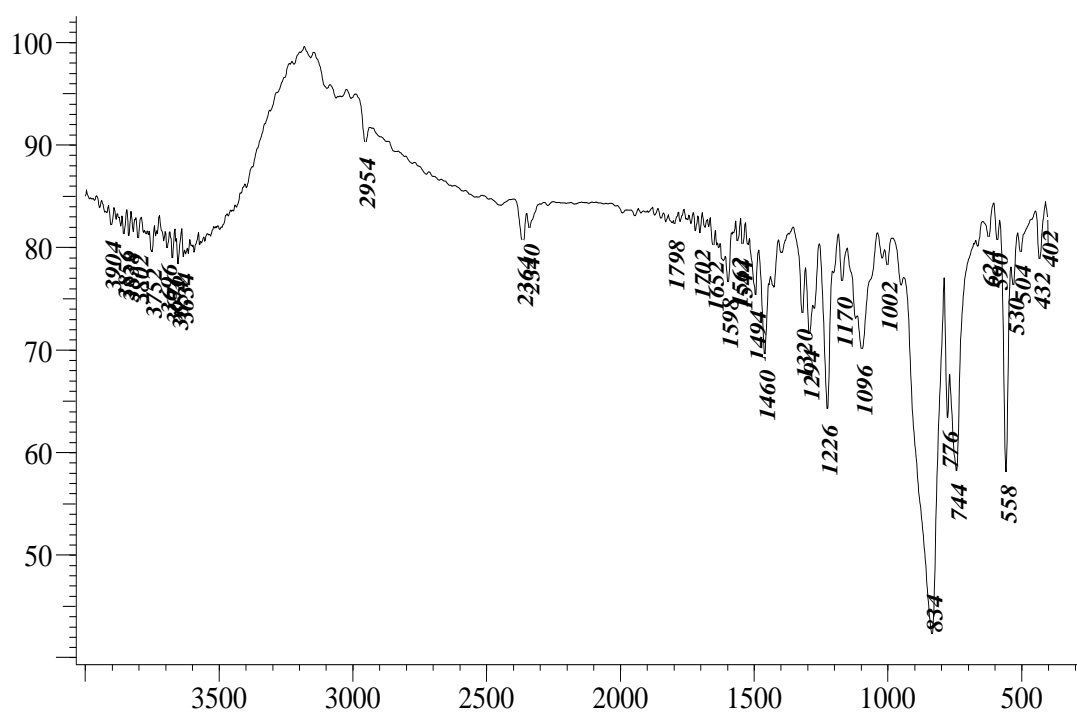

**Figure S14.** The IR spectrum (KBr, cm<sup>-1</sup>) of [Zn(Mebta)<sub>4</sub>](PF<sub>6</sub>)<sub>2</sub> (8).

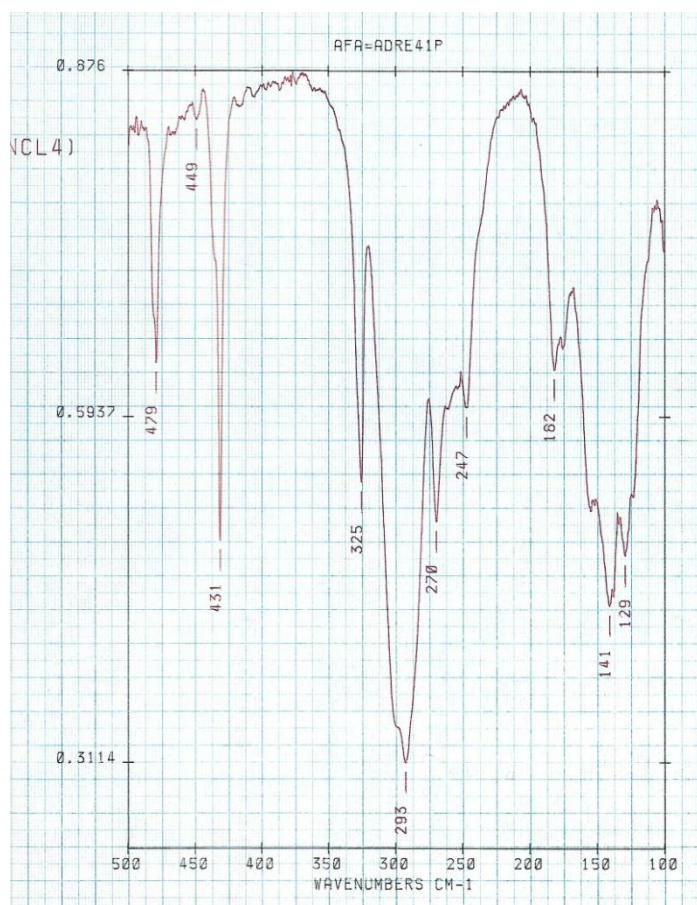

**Figure S15.** The FT far-IR spectrum (polyethylene, cm<sup>-1</sup>) of (MebtaH)<sub>2</sub>[ZnCl<sub>4</sub>] (2).

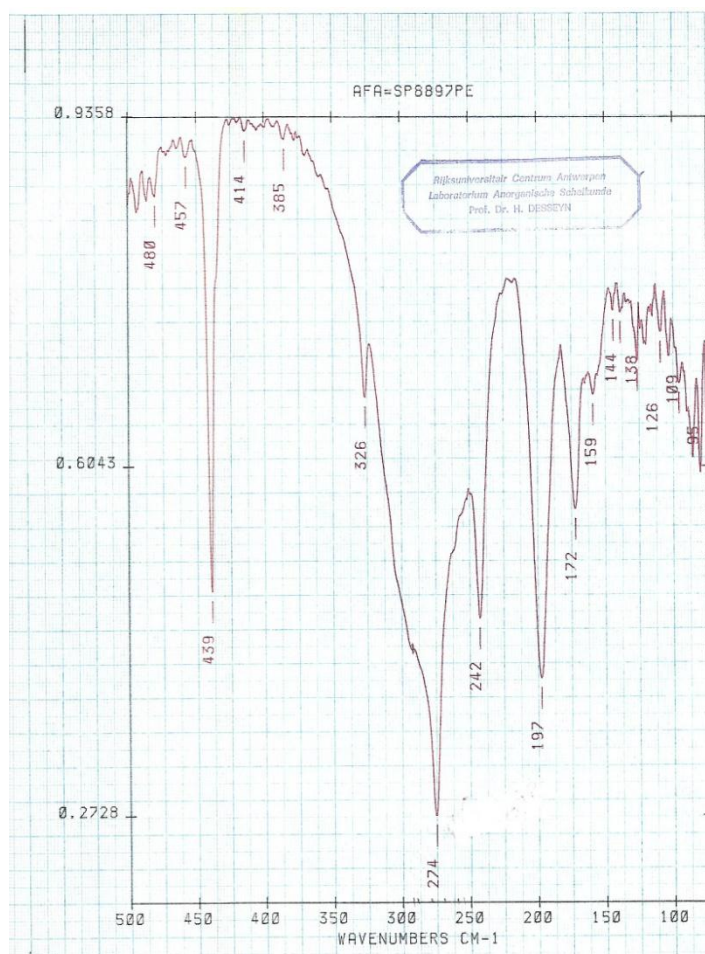

**Figure S16.** The FT far-IR spectrum (polyethylene,  $\text{cm}^{-1}$ ) of oct- $[\text{Zn}(\text{NO}_3)_2(\text{Mebta})_2]$  (**6**).

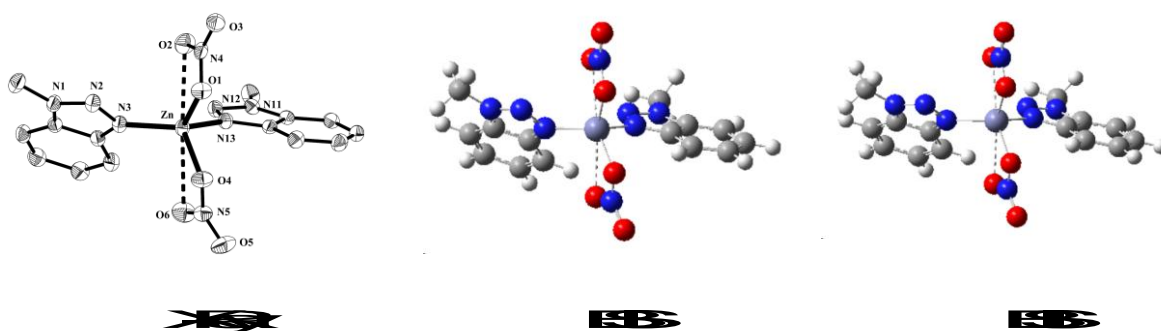

**Figure S17.** The X-ray structure of **5** (left) along with the DFT calculated gas-phase ones (BSI and BSII). The dashed lines indicate long Zn- $\text{O}_{\text{nitrate}}$  interactions (see also Figure 5).

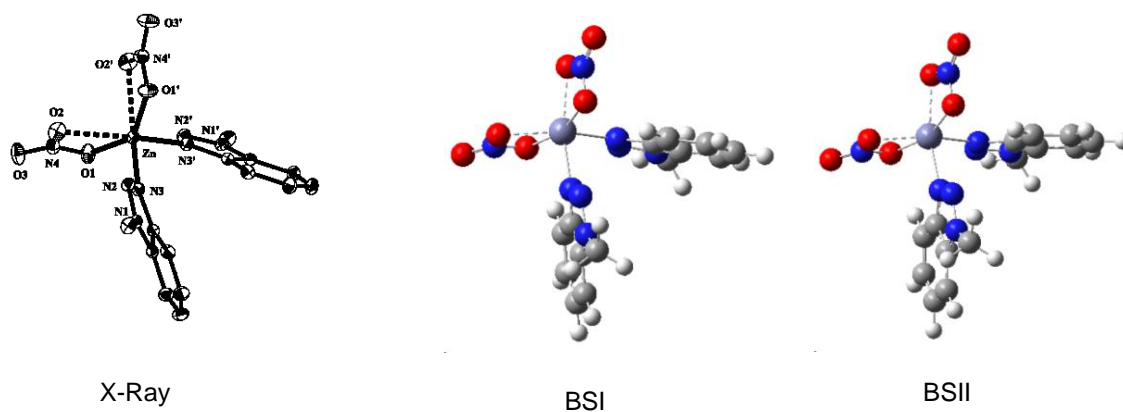

**Figure S18.** The X-ray structure of **6** (left) along with the DFT calculated gas-phase ones (BSI and BSII). The dashed lines indicate long Zn-O bonds. Note that these bonds have been drawn with solid lines in Figure S6.
